# Supplementary material for: Targeted deletion of SAP1 abolishes the expression of infectivity factors necessary for successful malaria parasite liver infection
Source: PubMed Central journal article supplement (PMC2615191; doi:10.1111/j.1365-2958.2008.06271.x), 2008-05-13
Supplement: mmi0069-0152-SD1.pdf [file mmi0069-0152-SD1.pdf]

**Supplemental Table 1. Depletion of *PySAP1* does not affect sporozoite development in *Anopheles* mosquitoes.**

| <b>Experiment</b> | <b>Genotype</b>  | <b>Mean ooSPZs/ mosquito<sup>1</sup></b> | <b>Mean sgSPZs/ mosquito<sup>2</sup></b> |
|-------------------|------------------|------------------------------------------|------------------------------------------|
| <b>1</b>          | <i>Pysap1(-)</i> | <b>79,000</b>                            | <b>17,000</b>                            |
|                   | <i>PyWT</i>      | <b>85,000</b>                            | <b>18,000</b>                            |
| <b>2</b>          | <i>Pysap1(-)</i> | <b>96,000</b>                            | <b>34,000</b>                            |
|                   | <i>PyWT</i>      | <b>102,000</b>                           | <b>27,000</b>                            |
| <b>3</b>          | <i>Pysap1(-)</i> | <b>60,000</b>                            | <b>15,000</b>                            |
|                   | <i>PyWT</i>      | <b>65,000</b>                            | <b>14,000</b>                            |
| <b>4</b>          | <i>Pysap1(-)</i> | <b>63,000</b>                            | <b>17,500</b>                            |
|                   | <i>PyWT</i>      | <b>ND</b>                                | <b>20,000</b>                            |

<sup>1</sup>Mean number of oocyst sporozoites per mosquito midgut dissected at day 10 post blood meal infection from  $\geq 20$  female mosquitoes.

<sup>2</sup>Mean number of salivary gland sporozoites per mosquito dissected at day 14/15 post blood meal infection from  $\geq 50$  female mosquitoes.

ND: not done

**Supplemental Table 2. Sequences of primers used in this study, restriction endonucleases sites are underlined.**

| <b>Primer</b> | <b>Sequence</b>                                    |
|---------------|----------------------------------------------------|
| PySAP1rep1F   | GGGGT <u>ACCGT</u> GCAATGTGAAAATGATAATGCTCGATAAG   |
| PySAP1rep2R   | GCCCA <u>AGCTTTTT</u> CTTTCTTAAATACAAAAAATAATTTAT  |
| PySAP1rep3F   | GG <u>ACTAGT</u> CCAGCTATAAACTCCGAAACATCGAATTATGT  |
| PySAP1rep4R   | TCC <u>CCGCGG</u> GCCATCGCGTTGATGCTTTTGGGAATTATTGA |
| PySAP1TestF   | CTCTTTTTGGGAGTCAAAAACGGTATGC                       |
| PySAP1TestR   | CACCCTTATAACCATCATTATCTACTTTTCC                    |
| TgF           | GGCTACGTCCCGCACGGACGAATCCAGATGG                    |
| TgR           | CGCATTATATGAGTTCATTTTACACAATCC                     |
| PySAP1orfF    | GGTAAACCACGGCACGTTCCCTATGTTT                       |
| PySAP1orfR    | CTTGATTTATCAGCATTGTTAATATGCCC                      |
| PyCSP F       | AAGAAGTGTACCATTTTAGTTGTAGCGTCAC                    |
| PyCSP R       | CACTACTGGTTGATTCAATTTATTTTGAGCCTC                  |
| PyTRAP F      | CCAAGCAATCTACCAGAAAATCCATCTGACTCA                  |
| PyTRAP R      | CCAGTCATTATCTTCAGGTAATTTAAACTGTTC                  |
| PyUIS3 F      | TCATCAGGATTAGTGGCAAGTGTTATTGGGGTAC                 |
| PyUIS3 R      | TGGTTGATATTGTTCTTTAAGAAAATGCTCCAC                  |
| PyUIS4 F      | CACCCTGAAGTCCGAGAAAAATTTGGAATTAGA                  |
| PyUIS4R       | TATGTATGGGTCAAATGGTTTATCATTCTACT                   |
| PyUIS2 F      | GAAGAAGTCCCAGATGAATCAAAAGAAGATGAC                  |
| PyUIS2 R      | ATCGTAGAAAGCTAGTTTTGTTCCGACTTTTCC                  |

|            |                                      |
|------------|--------------------------------------|
| PyUIS28 F  | TGGGTAGTAGTTTTGTTGAGAGAGTATGT        |
| PyUIS28 R  | CCAAGGATTGGGTACAAAATTGGAAGTTTCC      |
| PyP52 F    | AGTTGTGCATGCAAAAGAGATGAATATATCGGC    |
| PyP52 R    | GCCAAAATGTTCTTTTCTTTCTCAAAGGTCCATTG  |
| PyS4 F     | TGTTTGAGAGGCAAAAATGGATCAGAAATGTCG    |
| PyS4 R     | GTCATATTCTTCATCACCCACCTTCATATTCCCA   |
| PySPECT1 F | CCATTTTAGTCCTATTTATCATTTTAAAATGTG    |
| PySPECT1 R | CAGTTTCACAACATCATCAGAAGTATCTTCA      |
| PySPECT2F  | GAATGTGGAACACAAGCTATGCCATTTTCTGAT    |
| PySPECT2 R | TCCTATTGATTGGCCTGAACCATGTACTIONGAGCA |
| PyHSP70 F  | CCCGATGAAGCAGTAGCATTAGGTGCAGCT       |
| PyHSP70 R  | TGGAACACCTCTTGGGGCTGGTGGTATACC       |
| PfSAP1orfF | GAAAAATGAAGAAGATAAATCCGATGGAGATG     |
| PfSAP1orfR | CGTCCTCCTTTTTATTTTCGATCCTCCGTTGTAC   |
| PfCSP F    | GAGAAAATTAGCTATTTTATCTGTTTCTTCC      |
| PfCSP R    | ATCAGGATTACCATCCGCTGGTTGCTTTAA       |
| PfHSP70 F  | CCTGACGAAGCTGTCGCTTTAGGTGCTGCT       |
| PfHSP70 R  | TACACCTCTTGGTGCTGGTGGAAATTCCAAC      |

## Supplemental Text 1: Annotation Correction and elucidation of the coding sequence of *PySAP1*

The annotated contig for *SAP1* gene **MALPY00932** (**AABL01000929**, gi:23491243) contains **9721** bps and encodes only a protein of **2694** amino acids. However, comparative bioinformatic analysis with *PfSAP1* DNA and protein sequence on sequenced chromosome11 (**MAL11**, **AE014843**, gi:23496404) revealed that the N-terminus was missing and the C-terminus was incorrectly terminated. The missing N-terminus with the 5'UTR of *PySAP1* was located on contig **MALPY01173** (**AABL01001169**, gi: 23478694) which contains **4359** bps and encodes a protein of **621** amino acids. These two *P. yoelii* predicted proteins overlapped identically between the first **141** amino acids of the **2694** amino acids protein (**MALPY00932**), and the amino acids **464** to **604** of the **621** amino acids protein (**MALPY01173**). We expect that a sequencing error occurred at the end of **contig MALPY01173** that caused the termination of the ORF and the splitting of the contig. In order to test this, we constructed sequencing primers where the forward sense primer (5'-TGGACTAAATAATTCTTTTCAAGTTATCGA-3') binds to a pre-overlap sequence in the **MALPY01173** contig, and the reverse antisense primer (5'-TGATAGCTATTTTGTTTAACATCTTGTTGT-3') binds to a post overlap sequence (even further downstream of the predicted stop codon of the **MALPY01173** contig). The expected size of the amplified fragment is **690 bps**. High-fidelity Pfu DNA polymerase amplification from *P. yoelii* genomic DNA and from cDNA (amplified from salivary gland sporozoites RNA) generated both ~ **690** bps DNA fragments that were sequenced. The fragments gave the same sequencing results and matched perfectly the predicted full length *PySAP1* coding sequence. Furthermore, we constructed pre-ATG sense forward primer (5'-GCTAACGCATATACCTATGCCTAAGGACGTATC-3') (that binds to 5'UTR region in the mature *SAP1* mRNA) and an antisense reverse primer (5'-GGGTTTTTCTTTTTTATGGTCAGATATGTCTTC-3') that binds in the coding sequence of the gene downstream the start codon. This sequence was amplified from salivary gland sporozoite cDNA with the expected fragment size of **574bps** and sequencing verified the matching of this sequence with the previously obtained data. For the verification of the C-terminus sequence and the intron - exon organization in this region, we constructed a forward sense primer (5'-CGAGGAAGACAAGTTCAACAATCTTTTAATCAC-3') that binds to a sequence before the end of the first exon, and an antisense primer (5'-ATGTAACGAGGTGTAGAAAAATGTCTAAA-3') that binds to a 3'UTR region in the

mature *SAP1* mRNA. Interestingly, the amplification from salivary gland sporozoite cDNA and from genomic DNA gave rise to two different fragments in size, 800 bps and 1041bps, respectively. Sequencing of both fragments revealed the correct missing exon 3 sequence, and the universal splicing signals gt and ag were detected in the fragment amplified from genomic DNA at the boundaries of the second intron separating the second exon from the third exon. Furthermore, using blast searches with the *P. yoelii* *SAP1* protein sequence, we retrieved the *P. berghei* **contig 4855 (11,703 bps)** from the Wellcome-trust Sanger institute blast server. In this contig we identified *PbSAP1* nucleotide sequence with the same exon-intron organization, the identical splicing signals and similar intron sequences to *PySAP1* nucleotide sequence. The predicted *PySAP1* and *PbSAP1* whole protein sequences shared up to 88% amino acid identity. Prior to the assembly of the new **contig 4855**, *PbSAP1* sequence was dispersed over 2 contigs with missing end and intermediate DNA sequences; genomic sequence **PB\_RP1438 (CAAI01001256. gi: 56490746)** and genomic sequence **PB\_RP0468 (CAAI01000407. gi:56493516)**.

#### ***PySAP1* coding sequence:**

```
ATGAGAAAAGGTAAACCACGGCAGTTCCTATGTTTTTGAGAAGCGAAAACAAAAAGATA
CTTTTTCTTTTTTCATATTTTATGTCCAAAATGATATACAATTTATTTTCGATCAT
TACGACATTGGTTTAATAGTTCTTACAAAATACATAACATACGAAAAAGATATGAAGAA
GATAAAAATAATTTACAACATGAAAATAATAAAAATGATTTAGAAGACACAGAATCGATA
GATGAAAAAGTAAGAGCTTTTTTTTTAACTATAAAATAAATTCGAATGAAGACATATCT
GACCATAAAAAAGAAAAACCCGAAAAAATAAAAAAGGCAAAAAGGGTTCAGTAAACAAG
GAAAAAGTAATGAACTAATGAAAAAAATTTACTGCAAAAAATAATTATTCTATTATA
ACACGTTCAAAGACCGAGGAAATTGATCCTCTCAAGAATGATGAAAATGATAGTCCTAAT
AGTAATAATGCTCATGAAGAAAATAAACACAAAATGAAGACATCACAATACAAATAGC
TATCATAATAATAATGACAATCACTCCAACAATACGTCTGATATCCTCAAACAAACAGGG
CATATTAACAATGCTGATAAATCAAGAGTAGAAGGTGTAAAGCAAGAATCATGTGAACT
ATTAGTGAATCAGGAGAATCCAATACACTAGATAAAAAAACATTAATTTCAACTAAA
GAAATTTGTAAAAATGTAATAATAATAAACACATTGAGTATTGATGAAGAAATAATC
GATAAAAAACAATAATTTAACGACCAAAATTTGAAAATGCAGAGATTAATAAAAAAT
AATATAAAAACGTGTATTAATGAAACCAAAATAGAAGATAAAAAATGGCCAAAAGAAGAT
AAAAATATTATAATAAAAAATAAGCTGACAATAACAATATTAAGTAAACAAGTGAAAAAT
AATAATACAGAGCAAGAATACACAAAATTTCAAGAAGACATCTCTATGTTAATAGAAAAT
```

AATAAAAACGAAACTTGTAATAAACTAAATTCTGAAGAGAGAAATAATACAAATGGA  
GAAACCCAAAAAGAAAAAGAAATAGATGATATATTTTCTGTACGAAAAAAAATGAA  
ACTTATAAAAAATTTAGTAAAAGAATTAATAAAACAAAACTAATGAATTTATAAATTAC  
CATGATGATCATTGTTTTATATAACTGATTTATGTAGAAAAGGTACTATGTTGTCATTA  
AGAAAAATGAGGTATTAATAAAAAAATGCTAAAAATGCTCATTCTACCATAAATTT  
ATTAATTCATTTGGACTAAATAATTCTTTTCAAGTTATCGATGACGTTCAATCATTAAAT  
AATATGTATATGAACTTAAAATTGTTTGATGGGCAATTAATGGACAAATTAATGAAAAC  
AATCTTAATGATCTCACAATTTATTAATAATCAAAAAATAAGGCACCCCTTTCACATCAAT  
AATAGTGCCAATAATAACATTAGTAGTAATACAAATTCGTATATTTTCATCTAATGATAAT  
TTAACATACCATCATCGTATTTTATATATGATTATACCAATACCGACAAATTTGCGTAT  
ACATTAAATAACGTAGAAAATTTAGAACATATACATAATTATCAAAATGTTTCATAACAAT  
TTTTATCCCACTAGCCAGAGTACACTAGCAATAACAACATTAATAATAACTTTTATA  
AGAAATTCGTTTAATAATAAAAAACGATGCCGTTAACTTTAATTAATCAAAATATTGAT  
AACTGTTCTAATAAAAGTAAAACAGATATAAAAGATGAGCTCAATTCTACCCCTTTAT  
TCCAGTAATTATCAACCAACAGTTACAACCTTCAACATTTATAAAAAGACATATTTAAAA  
CCCGAAAAACTAAAAATTATTCTAAAAATGGAAATACATTTAAAGCACAAACTGATGAT  
TATATTATAAAAACAACAAGATGTTAAACAAAATAGCTATCAAAATTTTATATTAATCAA  
ATCAAAAATGAACATATAACAACACTATTAATAGCCAAAATAATATAAAAAATGTTAAC  
TTCCATTCAAATAATATACCTCTGATAAAAAATATGCCAACGGTTGTCTATTCTATCAA  
AATGACACATTCGGAAACACCATCCACAATAATAGCTATAATAATGATATAAATGCTGCT  
ATATCTTCTGCTACTACTTCTAGTATTGCCATCCCACTGCTACTAATGCTAGTATTTCA  
TCACCCACTTCTACTACTATTAATATTGATCAATGCTATAACCAGATTTTGAATCAAAT  
GGAATAATTCATAGCAATCCATAAGTAATAACGATTCAAATAATAATATGGTAGATTTA  
AACCATATAGATCATAAAGCCAAGAATATAAATATGACATGGGGGGATCATAATTCAAAA  
AATACTACAACCATCCGAATTTAAATATCCAAACAGAGACAACAAGTATTAATAATGAT  
TATTATCACACAAAACAACCTGATATAAACGAAAATTTCTAGTCTGCACACTGACGAAGAA  
AATAATCTTGAAGATAATAACAATATGAAAAATGCTTCTTGTAAAAAAGGCATAAAT  
AGAAAATGTTATTCAAATAATAGCACCATCAACAATAATAAACAGTGATAATAACCCT  
GAAAATAGAAACCAAAACGAATATAATGATTCTTGTGATGGTCAAAACAATTATTGTCAG  
CAAAATAATAATAATGATGACAACAATTACGATAAAAAATATTCCGCAACTTATATCAGA  
AGTAATAATTATTCAAACGGAAATATATATGACGATTAATTATGAAACCAAGCAAAGT  
GAAGGTATTATTTCAAAAAATCAAATGAAAAATAATTGTTTTCGCGATAACAATAAATTT  
AACCCAACTGATTTTAAAGAAGTATCCCTAAATCCACAAGCATTAAATAATATCAGTAAC  
AGCATGACATCTAATGATAGCTCTATGAATCAATATAATAATGCCAATTCGGTTGCAAC  
AACAGTGTGGAAATAATAACAGATTCTAATCAGTTCAAACAAAATATCAATAGATAT

AATAATAGCAATTCCATTGAACTTAAACTAACTCACAATTAATGATTATTCTAGTAAT  
TCCAACACAATCCTTTTAAATGGATGAATGTGATTCAAATGAGCTTTTAAATCCTCATAGT  
AGTGATAATAATTATTTAAATGATAAAGATTTATTACATAGTAATAATATGACTCGAAAT  
TGTTCTTATAATAATGATAACAGATCCAATACATTTAATGAATTGGTTAACACATGTTA  
TTTCAAATGATGGTTCTCCTCAATCTTCAAAAAATGTAATAAAAAATTATAGCACTATA  
TATGAGTCTCAAACAAATAAATTAGAAACAGTTTTTCCCAATGTACAAAATAATAATAAA  
TATATGCGCCAAAATAATATACACCAGACTAATGATACAACCAGAAATGGTATAGAACAA  
TTTGAATGCATTACAATAGTGATAATTACTATATCAATGATAATAACGTTAGCAATACT  
AGTAATGTTAATGATAGCAAAAATATCAATAGGGGAAACAATTCTGAAGATTTCAAACG  
ATAAAAAATGAAATAAATATCCAGCTATAAACTCCGAAACATCGAATTATGTATATAAC  
CCTCAAATAATATAATGTATATACAAAACACCTCTGAGCAAATTACCAAAGGAAATAAT  
AATAGTTATATACAATATAATACAACATATTCAATTAATAATGAAAATATAAGCACAAAT  
TATTTAACCATGAATTCATTAATTAACGATCAGAATAAATTGGAAAATTGCTCAAAAAAT  
AAAAATAATGTAATGATAGTAAAAATAAATCCATATATGATGAAAAAATCAAAAAAT  
TGGGATAATACAAGTATACCAATTAATAAAGCATGAAAATAACATTTATGAAATAAAA  
GAAAACGATNTAAATTCTCAAGAAATCGAATTAATGATAAAACCACCCAACATTTTGAA  
AATACTGACAAAGAGGGCAATGAAAATAATTCTGATAATAATGGCAATCCTAATTTTGTA  
AACAAAAATATAGAAAATAATGAGAATATAGCTAATTCATTGGAAAAGAACAAAATTAT  
ATTTTTCAGGAAAATCTCCAACATTTAGACACAAAAAATGTTAAAAACAATGAACTTAT  
TGCTTACCAAGTAATGAAATGTGTGAGGTTTCTCAAAAGCAAAACAATAACATACATGTA  
TATGACGAAAAAATATAGAAGAAAATCAAACCTGTTATGTTTCAAAAATAATTTACAATAT  
AATCAAGCACAAACCATACTATCAACCAAAAAACAAAAGGTATTTATGATGATAAAACAAAT  
TTTAACCCAGTGCAAAAATACCAATGATTTACAAAGAAATACCAATAACATAATAACTAAC  
GATCCTTTGATTA AAAACATTTATGAAAATAAAAATGCTTCTTTTATAAACTCAAAACAA  
TCTGTGATATTACCAAAAATGATGATCTTGATAATTCTAATTTTAAAGGTAATAATGAA  
AATAATAGCAAAACGAAAAATATTAATGAATTTTCATTAATAAAAAATTATAAAAAACAGT  
ATCAATAATTCCCAAAAAGCATCAACGCGATGCAGATATTAATTGTTATGATATAAATACA  
AAATACAAGGAAAATTTGAAAAAACAAAAAATAGCATCGTTTCAACTGTTGATAAAAGT  
GATTATTTTGATGTTGAAAATAATGAAATTCATGGAAAAGTAGATAATGATGGTTATAAG  
GGTGCAGAAATCGATAAGCAAAAATAATCAAGAAATGAATAATAATTTTGTAAATAGAACA  
AAATATATCAAAGTAGAACTATAACAGACTCAATTGACGATAAAAAATAACAATTCTATA  
TCTTCTATTGAAAATAATACTAATAAAACCATATATGATATATATGAATGACACTATG  
CAATTAACGAAAACATAAATAATAATAAAACCTAAACATTCAGAACAATAGTAATGAT  
ATAATAACTAAGGACAATAACACAAAATAATTTGGGAAATATTGATAATAATTTTACAAAT  
TCAGAATATTCACAATTTCATACGAATAATAGCGTTAAAACGCAACATAATCCAGAGCTA

TCGCAGCGCGAAATGAATTATTTATATACGAACAAAATGGCGCTTATAAAAGACAATATA  
AACATAGATGCAAATGATAATATTATAAATTTACAAAACTTTAATTATATAAATGACCAA  
ACAAATGATAATAAAAACAGAAAAATGAATTCCTTAACCATGAAAATGCATAGCAATGCA  
TCTAGCTATATTTTTGACAATAAAACAAATAATAATAGTGAAGAACAAAAAATAACGAT  
TTTAATTTGGGCTTAAATCCTGTAAAAGATAAATATGATAATTTATACGCAAATTATTAT  
GTTAATGATAATGATCACATCAATAGCAATGACCAACAAATAAAAAATTCCAACCTTGAA  
ACTCAAGACACATTAATCGAAGGAAAAAAAACACCTTAAAAACAATTTCTATGGAACAA  
CTTCCATTTACAATTCCGTGAATAATTTTGAAAATAACTACGAAAGTAATTCAGTTGT  
TATAAATATACAAAAGGCATAAACACAACCCCAATGCTAAATGAAAACATAAATAACGCA  
TGCATAAACCAAGAAATTTATGATAACAATAGACAAAATATTGAAACTCCGAGATCTAAA  
AATTATCCTGTATTTAACATGGGAATTCAGAATAATAAAGCAAATTCAGAAGCATTAGAT  
GAAAATGGTCAAATACAATCAAAAAATGTTTTAACTAATAATTTATTTAAATAAATAAA  
AAATACAATTCAAATAATGCAGAAACAAATAACAATCTCATATATGACAATAATGAAAAT  
GCTCAATATAATTATTTAAATGATTTACATACAAATGGAAGGAATTCTATTTATGAGTCG  
CATATGGATTTGCCACCAATCACCTCATCTTTTATATTTAAATAATCTAAATGCAAAA  
AACCTAGAGAATATATCTGAACGAAAAATTAGTATACCTAATGAATACATCAATTTCAAT  
TCCCTTAATCATATTTACAATGTACCCCAATTTGATAATCTACCAACAATGTAAACAGC  
AATACAAGATATAATAATAATAATAATAGTAATAATAGTAATAATAGTAATATTTGTGAT  
AACTCCATAACAATACTAATAATAGCATTGACCCAAACAACAATAACACCTACAGTG  
TATAACACTGAAGGGCCTATTTCTAATGTTGATAATAATTATAATAACAAATATGCCA  
TTAGATAAAAACTCTATTATAACAAACCCTCATTATTCAGCAACACAAATGATAATAAA  
AATTCTGCAATATACAATAATATTAGATATTCAAATAGAACATTTTGCAATTATAATAAT  
ATTAAGGTTCCAATGACAACAATATTTATATTCCAATAACAATATTAATCATATAAT  
GATAATATTATGCATAATTTGAGCAACAATGTAAAGGGTTATAATAACAGTAGTGATAC  
ACTTATCGAAATAACAATATTGCTACTAATGGAAAAATAATAAGGAACCTAACAAAGGT  
AATAATAATTTATATAATTTTAACAATTATAAAAACTATATACATAATGATTCGTCTAAT  
TTAATAAATGTAAAGTCTGAACACCCTGAAAAATTTAATTATGAAAATAATTTATTAGAT  
AATGTTGATAAAACAAATAAAAAATAATATAAATAGGCAAATGATAACGAAGAATTAAC  
AGTCTTATAACAGAAGCACACATGAGATCCTTTGATAATTTTAAAGCATCAGAGGAAAAT  
AGTATGCGAAATAATATTAATAATAGATTTATTAACAATAATAATAATGATCATTATCAA  
ATGATGATAACAATATCAATTTATATAATGCTTATAAATATTTATATAGAAATAATAAT  
AAATATATATAACACAAACAATAATGATAAATCATCAAATAATAAATATTTATAGT  
GATATCAATAATTTTCTCAAAAAAATTAATACGTATACACCAATAATTTATTAACC  
TCACAAAACAATAATGTGTTAATACACAAGATAACATGCATCAAGATCAAACAAATCCA  
ATTATACTATATAACAACATAAATGGAACAAAAACAACCTAATAAGTCATATAAAAAAGT



GATATACCTTCAAGTGGTTGTGATACTAATCAAAGCAATAATGACATGAAAAACGAAAAT  
GGTTTTAATTATTTATATAATGGTATTCCTTTTGATTATTTCAAGAATGATATGGCTTTT  
ATCTACAATAATAATATTAGAAATACTGGGAATATCATCGAAGGTACCAACATTATCAAT  
GATCATAATAACAATTTGAAAATAATGATGAACGAATGAAAGAAAATCGAAATAACAAT  
ATGTATGCCAATTTAATAACCCCTCAAATAACAATAATTTGTAAAGACCCGAAAAAT  
TATTATATTAATAATAATTTTGATATTTTAAATAACATAGATAACTTAAATGATATAAAA  
AATGAAAATAATATAAAACAACAGCAATACCATAATAAATTCGTCTGTAGATTTACAAAAT  
AATAAAACAAAAATAAAGACAATCCTAATTACAATGTTAACAACTGCAACGAAAATAAT  
AATAATGCTGATTTAAATATATCCATGAATTAATAAATTTTATAATTCAAAGGAACA  
AGTTATAAGAAAATTAATGATCGTATTAATGATACAATGAACAACATAAATATGACTAGC  
AATATGAATACTACTGAAACTTTAGGAAGTAATGTAGATGATACTTACAAAAGCATTAGT  
AATAAAGTACTACTAGAAATAGAAATAGTAATTTCAACATGATGAATGATAACCAATAT  
ATACAGTTGCAAGACGTTGCTTATAAAATTTCCGATAATTATGATAATTCTGTAATAAA  
GAAGACACCGAATCTTGCCCCAAAAACCAAGTAATTTAAGAAATACTAATTTAATTGAT  
TCTATGAACATGATGATTTAAATAAAGCTAATAAAAACATATAACAATCATCCATATTAT  
AAAAATGGTATAGACGAAAATTATTTCAATTCGAATATGAATATTTTATTACAATCAGAA  
TTTAGTGACCCAAACAATATTATTCATAATAATTTGAAAAAATAAAAACAAATAAACCA  
TATAATCAGTCATATCCGTCTAACTTACCATACAATAGAAATTTCTAATTATAGCAATAAT  
AATATTAACGAAATAAGCCAAATAAATGAGGGAAAAAATAGAGACACAGCAAATAATTAC  
TACATACCACCATATATGAACCCAAATGATCAAGCACCAGATTTTAAAGATAATTATTTG  
AATACGTGCAAAAATAAATATTGATATTGACAATATAAATTATTATAAGGCGCAGCAATAT  
TACGCAAATAATAAGTTTATTAATGTGAATTATGACAAAAATATATATACAAATGAACCA  
AATAAGTATTCTAAAAATTACCCTAATGAAGGCTTTGAGAAAAATATAGATGGTACTTAT  
AATTATAATTTGGGTATGCAAAATGAACATCATAATCCAAATTACCCATTAATATTTTA  
AATAATAACAATCTATATAATAATTATGTTTATTTAAACATGCTAATAATGCATATAAC  
ACAAACAACAACAATCTTAAATTACACAACCTTAGAAGAAAATAACAACTAATCCTATAT  
AATAATAAAAAAGACACTTACACAGATTTTAAACAATTCAAACCATAATGTTAACAATCCT  
AATGATTTGTTTCAACTAAAAATTATGGACCCTAATGAAAATAGAATTATGAACCCCTT  
AATAATATTCAAATCCCAATTAATAAATTACTATAATCTCCAACCTTTATTAACCTATTTA  
CGAGGAAGACAAGTTCAACAATCTTTTAAATCACAGCGCTTCAAATACAAATAACAATAAC  
AATTTACGAAGTGACACCAAAAGAAATTATTCCATATCTTCAGTAGGGTTTAGCAATCGA  
AGCAAAAAGGTGGACAATTTGCCCTCGTACATATGCTGTAATAGTGCTTGTGCCGATTTC  
AAATTGACATGCAATTTTAAAGTTTTTACAATTCAATCATTCCAATTATAGTTTCAACATC  
CCCTATGCTATATATAATTGCTACAAAAATCTTATGAACCTTTATAATTATTTTACATCA  
ACACTTTGCCCTCAGCAAACCTATTTGTGGAAGCATTCTACTCAAGAACACGAAACCATA

TTCAACGTTTATTGGCATTGCTAAACACGGAAAAATATAAATATATACAAAACATAATA  
TTGTTTTTAGATAATAATTATACACAAGAGCAGCATGGCTATTAATAAAGGATATAAT  
ATGGATGATTTTGAAGTCCAAAAAGCAGAAAGAAAATTAATAAACTAATGCTTTTAGTA  
TTAAATTTACTTATGACCATAAAAATGACAATTCGAAATATGAGCATATAAAGGCTTTT  
CTATATCCATTAAGGAACTCCCATATAAATTTGAAATAATGAATCGATTCTTATTTAT  
TAA

**PySAP1 amino acid sequence:**

MRKGGKPRHVPMLRSENKILSFFSYFMSKNDIQFIFDHYDIGLIVLTKIHNIRKRYEE  
DKNNLQHENNKNDLEDTESIDEKVRAFFLNYKINSNEDISDHKKEKPEKNKKGKGSVVK  
EKSNETNEKFTAKNNYSIITRSKTEEIDPLKNDENDSPNSNNAHEENKPNEDITNTNS  
YHNNNDNHSNNTSDILKQGTGHINNADKSRVEGVKQESCETISESGESNTLDKKNINISTK  
EICKNVNNNNNTLSIDEEIIDKNNLNDQNFENAEIKNKNNIKTCINETKIEDKNGQKED  
KNIINKNKADNTILSKQVENNTEQEYTKFQEDISMLIENKNETCKNKLNSEERNNTNG  
ETQKEKELDDILFPVRKKNETYKFKSKRINKTKTNEFINYHDDHCFYITDLCRKGTMLSL  
RKNEVLNKKNAKNAHSHHKFINSFGLNNSFQVIDDVQSLNNMYMNLKFDGQLNGQINEN  
NLNDLTNLLKSKNKAPFHINNSANNISSNTNSYISSNDFNIPSSYFIYDYTNTDKFAY  
TLNNVENLEHIIHNYQNVHNNFYPTSPEYTSNNINNNNTFIRNSFNKNDVNFNINQID  
NCSNKSCTDIKDELNSTPLYSSNYQPTVTFNIIKTYLKPEKTKNYSKNGNTFKAQTDD  
YIIKQDVKQNSYQNFYINQIKNEHITNTINSQNNIKNVNFHSNNIPLIKNMPNGCLFYQ  
NDTFGNTIHNNSYNNDINAASSATTSSIAIPTATNASISSPTSTTINIDQCYNQIFESN  
GIIHSPISNDSNNMVDLNHIDHKAKNINMTWGDHNSKNTHNHPNLNIQTETTSINND  
YYHTNPNINENSSLHTDEENLEDNNMENASCLKGINRKCYSNNSTINNNNSDNNP  
ENRNQNEYNDSCDQGNQYQQNNNDNNYDKKYSATYIRSNNYSNGNIYDDINYETKQS  
EGIIKSNQMKNNCFRDNNKFNPTDFKEVSPKSTSINNISNSMTSNDSSMNQYNNANSRCN  
NSVGNNTDSNQFKQINRYNNSNSIELKTNSQLNDYSSNSNTILLMDECDSNELLNPHS  
SDNNYLNDKDLLHSNMTRNCSYNNDNRSNTFNELVNNMLFQNDGSPQSSKNVIKNYSTI  
YESQTNKLETVFPNVQNNKYMRQNNIHQTDTRNGIEQFECIHNSDNYINDNNVSNT  
SNVNSKNINRGNSEDFTIKNEIKYPAINSETSNYVYNPQNNIMYIQTSEQITKGNN  
NSYIQYNTTYSINNENISTNYLTMNSLINDQNKLENC SKNKNVNDKINSIYDEKNQKN  
WDNTSIIPIKNKHENNIYEIKENDXNSQEIELNDKTTQHFENTDKEGNENNSDNNGNPNFV  
NKNIENNENIANSIGKEQNYIFQENLQHLDTKNVKNNETYCLPSNEMCQVSQKQNNNIHV  
YDEKNIEENQTMFQNNLQYNQAQPYYPKTKGIYDDKTNFNPVQNTNDLQRNTNIIIT  
DPLIKNIYENKNASFINSKQSVILPKNDDLNSNFKGNENNSKTKNINEFSLNKYKNS  
INNSQKHQRDADINCYDINTKYKENLKKQKNSIVSTVDKSDYFDVENNEIHGKVDNDGYK  
GAEIDKQNNQEMNNNFCNRRTKYIKVETITDSIDDKNNNSISSIRNNTNKTIYDIYMNDTM

QLNENINNNKLNLIQNNSNDIITKDNNTNNLGNIDNNFTNSEYSQFHTNNSVKTQHNP  
SREMNYLYTNKMALIKDNINIDANDNIINLQNFYINDQTNDNKNRKMNSLTMKMSNA  
SSYIFDNKTNNSSEEQKNDFNLGLNPVKDKYDNLANYVNDNDHINSNDQQIKNSNLE  
TQDTLNRKNTLKTISMEQLPFHNSVNNFENNYESNSSCYKYTKGINTTPMLNENINNA  
CINQEYDNNRQNIETPRSKNYPVFNMGIQNNKANSEALDENGQIQSKNVLTNLKFINK  
KYNSNNAETNNNLIYDNNENAQYNYLNDLHTNGRNSIYESHMDLPPNHPHLLYLNNLNAK  
NLENISERKISIPNEYINFNSLNHIYNVPQFDNLPNNVNSNTRYNNNNNSNSNSNICD  
NSINNTNNSIDPNNNTPTVYNTTEGPISNVDDNNYITNMPLDKNSIITNPHYSSNTNDNK  
NSAIYNNIRYSNRTFCNYNNIKGSNDNNIYIPNNNIKSYNDNIMHNLSNNVKGYNNSSVY  
TYRNNNIATNGKNNKEPNKGNLNYFNNYKNYIHNDSSNLINVKSEHPEKFNYENLLD  
NVDKTNKNINRQIDNEELNSLITEAHMRSFDNFKASEENSMRNNINRRFINNNNDHYQ  
MMINNINLYNAYKYLRYNNNKYIYNTNNDKSSNNINIYSDINNFQKKINTYTPNLLT  
SQNNNVFNTQDNMHQDQTNPIILYNNINGTKNNLISHIKSDIPSSGCDTNQSNNDMKNE  
GFNYLYNGIPFDYFKNDMAFIYNNNIRNTGNIIEGTNIINDHNKQFENNDERMKENRNN  
MYANLNNPSNNTIICKDPKNYIKNFDILNNDLNDIKNENNINNSNTIINSSVDLQN  
NKTKNKDNPYNNVNNCNENNNNADLKYIHELNFYNSKGTSYKKINDRINDTMNNINMTS  
NMNTTETLGSNVDDTYKSISNISTTRNRNSNFMMNDNQYIQLQDVAYKISDNYDNSV  
EDTESCPKPSNLRNTNLIDSMNMYLNKANKNIYNHPYKNGIDENYFNSNMNISLQSE  
FSDPNNIIHNNLKKIKTKNKPYNQSYPSNLPYNRNSNYSNNNINEISQINEGKNRDTANNY  
YIPPYMNPNDQAPDFKDNLYLNTCKNNDIDNINYYKAQQYANNKFINVNYDKNIYTNEP  
NKYSKNYPNEGFRENIDGTYNYNLGMQNEHHNPYPLNILNNNNLYNNYVYLNMLNAYN  
TNNNNLKLHNLEENKLLIYNNKDYTYDFNNSNHNVNNPNDLFQLKIMDPNENRIMNPL  
NNIQIPIKNYNYLQLLLNYLRGRVQQSFNHSASNTNNNNNLRSDTKRNYSSVGFNSR  
SKRWTICPSYICCNALCRFKLTCNFKFLQFNHSNYSFNIPYAIYNCYKNLMNFYNYFTS  
TLCPQQTYLSKHSTQEHEHETIFNVYWHLLNTEKYKYIQNIFLDNNLYTRAAWLLKGYN  
MDDFEVQKAERKLIKMLLVFKFTYDHKNDNSKYEHKAFLYPLRNSHINFEIMNRFLFY
